# Supplementary material
Source: PubMed Central journal article supplement (PMC4598060)
Supplement: NIHMS720368-supplement-Supplemental.pdf [file NIHMS720368-supplement-Supplemental.pdf]

# AMERICAN SOCIOLOGICAL REVIEW

OFFICIAL JOURNAL OF THE AMERICAN SOCIOLOGICAL ASSOCIATION

ONLINE SUPPLEMENT

to article in

AMERICAN SOCIOLOGICAL REVIEW, 2014, VOL. 79

## **Racial Inequality Trends and the Intergenerational Persistence of Income and Family Structure**

Deirdre Bloome

*University of Michigan*

**Table S1.** Comparison of Markov Population Projection Estimates of Black-White Family Income Inequality and Observed Black-White Family Income Inequality

| <i>Time-Varying Aspects of Transition Matrix</i>        | Inherit Income |                 | Inherit Income and Marital Status |                     | Inherit Income and Marital Status |                     |
|---------------------------------------------------------|----------------|-----------------|-----------------------------------|---------------------|-----------------------------------|---------------------|
|                                                         | <i>None</i>    | <i>Inc+Fert</i> | <i>None</i>                       | <i>Inc+Mar+Fert</i> | <i>None</i>                       | <i>Inc+Mar+Fert</i> |
|                                                         |                |                 | <i>Independent Process</i>        |                     | <i>Dependent Process</i>          |                     |
| <b><i>Fertility by Race-Quintile-Marital Status</i></b> |                |                 |                                   |                     |                                   |                     |
| Observed Data                                           | -58            | -53             | -39                               | -28                 | -24                               | -12                 |
| <i>Counterfactuals with White Mobility</i>              |                |                 |                                   |                     |                                   |                     |
| White Income Mobility                                   | -97            | -97             | -84                               | -80                 | -                                 | —                   |
| White Marital Mobility                                  | -58            | -53             | -83                               | -79                 | -                                 | —                   |
| White Fertility                                         | -75            | -72             | -29                               | -51                 | -                                 | -32                 |
| White Fertility, Income+Marital Mobility                | -99            | -99             | -98                               | -97                 | -100                              | -96                 |
| <i>Counterfactuals with Independent Transitions</i>     |                |                 |                                   |                     |                                   |                     |
| Independent Income Attainment                           | -53            | -47             | -27                               | -14                 | -                                 | —                   |
| Independent Marital Attainment                          | -58            | -53             | -55                               | -30                 | -                                 | —                   |
| Independent Income+Marital Attainment                   | -53            | -47             | -44                               | -16                 | -10                               | 5                   |
| <i>Counterfactuals with Perfect Mobility</i>            |                |                 |                                   |                     |                                   |                     |
| Perfect Income Mobility                                 | -96            | -96             | -85                               | -98                 | -                                 | —                   |
| Perfect Marital Mobility                                | -58            | -53             | -83                               | -73                 | -                                 | —                   |
| Perfect Income+Marital Mobility                         | -96            | -96             | -98                               | -97                 | -                                 | —                   |
| <i>Counterfactuals with No Mobility</i>                 |                |                 |                                   |                     |                                   |                     |
| No Income Mobility                                      | -87            | -86             | -93                               | -86                 | -                                 | —                   |
| No Marital Mobility                                     | -58            | -53             | -81                               | -72                 | -                                 | —                   |
| No Income+Marital Mobility                              | -87            | -86             | -94                               | -92                 | -                                 | —                   |
| <b><i>Fertility by Race</i></b>                         |                |                 |                                   |                     |                                   |                     |
| Observed Data                                           | -27            | -13             | -15                               | -3                  | 7                                 | 24                  |
| <i>Counterfactuals with White Mobility</i>              |                |                 |                                   |                     |                                   |                     |
| White Income Mobility                                   | -86            | -83             | -65                               | -60                 | -                                 | —                   |
| White Marital Mobility                                  | -27            | -13             | -62                               | -55                 | -                                 | —                   |
| White Fertility                                         | -77            | -72             | -26                               | -48                 | -                                 | -24                 |
| White Fertility, Income+Marital Mobility                | -99            | -99             | -99                               | -99                 | -100                              | -92                 |

|                                                     |     |     |     |     |    |    |
|-----------------------------------------------------|-----|-----|-----|-----|----|----|
| <i>Counterfactuals with Independent Transitions</i> |     |     |     |     |    |    |
| Independent Income Attainment                       | -18 | -2  | -8  | 7   | -  | —  |
| Independent Marital Attainment                      | -27 | -13 | -60 | 2   | -  | —  |
| Independent Income+Marital Attainment               | -18 | -2  | -55 | 11  | 12 | 33 |
| <i>Counterfactuals with Perfect Mobility</i>        |     |     |     |     |    |    |
| Perfect Income Mobility                             | -81 | -77 | -67 | -67 | -  | —  |
| Perfect Marital Mobility                            | -27 | -13 | -65 | -51 | -  | —  |
| Perfect Income+Marital Mobility                     | -81 | -77 | -90 | -87 | -  | —  |
| <i>Counterfactuals with No Mobility</i>             |     |     |     |     |    |    |
| No Income Mobility                                  | -79 | -76 | -67 | -54 | -  | —  |
| No Marital Mobility                                 | -27 | -13 | -65 | -51 | -  | —  |
| No Income+Marital Mobility                          | -79 | -76 | -89 | -86 | -  | —  |

*Source:* Panel Study of Income Dynamics, National Vital Statistics, decennial Census, and March Current Population Survey data.

*Note:* Cell entries show difference between projected and observed KL divergence between white and black distributions as percent of observed KL divergence. Empty cells represent undefined counterfactuals.

**Table S2.** Markov Population Projection Estimates, Within- and Between-Group Inequality

| <i>Time-Varying Aspects of Transition Matrix</i>        | Inherit Income |      |     |                 |      |     | Inherit Income and Marital Status<br>Independent Process |      |     |                     |      |     | Inherit Income and Marital Status<br>Dependent Process |      |     |                     |      |     |
|---------------------------------------------------------|----------------|------|-----|-----------------|------|-----|----------------------------------------------------------|------|-----|---------------------|------|-----|--------------------------------------------------------|------|-----|---------------------|------|-----|
|                                                         | <i>None</i>    |      |     | <i>Inc+Fert</i> |      |     | <i>None</i>                                              |      |     | <i>Inc+Mar+Fert</i> |      |     | <i>None</i>                                            |      |     | <i>Inc+Mar+Fert</i> |      |     |
|                                                         | W              | B    | KL  | W               | B    | KL  | W                                                        | B    | KL  | W                   | B    | KL  | W                                                      | B    | KL  | W                   | B    | KL  |
| <b><i>Fertility by Race-Quintile-Marital Status</i></b> |                |      |     |                 |      |     |                                                          |      |     |                     |      |     |                                                        |      |     |                     |      |     |
| Observed Data                                           | 2.25           | 2.10 | .06 | 2.26            | 2.10 | .06 | 3.23                                                     | 3.30 | .15 | 3.24                | 3.30 | .15 | 3.23                                                   | 3.29 | .18 | 3.24                | 3.28 | .18 |
| <i>Counterfactuals with White Mobility</i>              |                |      |     |                 |      |     |                                                          |      |     |                     |      |     |                                                        |      |     |                     |      |     |
| White Income Mobility                                   | 2.25           | 2.23 | .00 | 2.26            | 2.23 | .00 | 3.23                                                     | 3.30 | .04 | 3.24                | 3.30 | .04 | -                                                      | -    | -   | -                   | -    | --  |
| White Marital Mobility                                  | 2.25           | 2.10 | .06 | 2.26            | 2.10 | .06 | 3.23                                                     | 3.29 | .04 | 3.24                | 3.30 | .04 | -                                                      | -    | -   | -                   | -    | -   |
| White Fertility                                         | 2.25           | 2.14 | .03 | 2.26            | 2.15 | .03 | 3.23                                                     | 3.30 | .10 | 3.24                | 3.30 | .10 | -                                                      | -    | -   | 3.24                | 3.30 | .14 |
| White Fertility, Income+Marital Mobility                | 2.25           | 2.26 | .00 | 2.26            | 2.26 | .00 | 3.23                                                     | 3.21 | .00 | 3.24                | 3.21 | .01 | 3.23                                                   | 3.26 | .00 | 3.24                | 3.26 | .01 |
| <i>Counterfactuals with Independent Transitions</i>     |                |      |     |                 |      |     |                                                          |      |     |                     |      |     |                                                        |      |     |                     |      |     |
| Independent Income Attainment                           | 2.25           | 2.09 | .07 | 2.26            | 2.09 | .07 | 3.23                                                     | 3.29 | .17 | 3.24                | 3.28 | .17 | -                                                      | -    | -   | -                   | -    | -   |
| Independent Marital Attainment                          | 2.25           | 2.10 | .06 | 2.26            | 2.10 | .06 | 3.24                                                     | 3.30 | .11 | 3.24                | 3.29 | .14 | -                                                      | -    | -   | -                   | -    | -   |
| Independent Income+Marital Attainment                   | 2.25           | 2.09 | .07 | 2.26            | 2.09 | .07 | 3.24                                                     | 3.29 | .13 | 3.24                | 3.28 | .17 | 3.23                                                   | 3.27 | .21 | 3.24                | 3.27 | .21 |
| <i>Counterfactuals with Perfect Mobility</i>            |                |      |     |                 |      |     |                                                          |      |     |                     |      |     |                                                        |      |     |                     |      |     |
| Perfect Income Mobility                                 | 2.26           | 2.22 | .01 | 2.26            | 2.22 | .01 | 3.23                                                     | 3.30 | .04 | 2.77                | 2.78 | .00 | -                                                      | -    | -   | -                   | -    | -   |
| Perfect Marital Mobility                                | 2.25           | 2.10 | .06 | 2.26            | 2.10 | .06 | 3.27                                                     | 3.31 | .04 | 3.27                | 3.30 | .05 | -                                                      | -    | -   | -                   | -    | -   |
| Perfect Income+Marital Mobility                         | 2.26           | 2.22 | .01 | 2.26            | 2.22 | .01 | 3.27                                                     | 3.29 | .01 | 3.27                | 3.29 | .01 | -                                                      | -    | -   | -                   | -    | -   |
| <i>Counterfactuals with No Mobility</i>                 |                |      |     |                 |      |     |                                                          |      |     |                     |      |     |                                                        |      |     |                     |      |     |
| No Income Mobility                                      | 2.26           | 2.18 | .02 | 2.26            | 2.18 | .02 | 3.25                                                     | 3.30 | .02 | 3.25                | 3.30 | .03 | -                                                      | -    | -   | -                   | -    | -   |
| No Marital Mobility                                     | 2.25           | 2.10 | .06 | 2.25            | 2.10 | .06 | 3.17                                                     | 3.28 | .05 | 3.17                | 3.28 | .06 | -                                                      | -    | -   | -                   | -    | -   |
| No Income+Marital Mobility                              | 2.26           | 2.18 | .02 | 2.26            | 2.18 | .02 | 3.19                                                     | 3.25 | .01 | 3.19                | 3.26 | .02 | -                                                      | -    | -   | -                   | -    | -   |
| <b><i>Fertility by Race</i></b>                         |                |      |     |                 |      |     |                                                          |      |     |                     |      |     |                                                        |      |     |                     |      |     |
| Observed Data                                           | 2.29           | 2.12 | .10 | 2.30            | 2.14 | .11 | 3.28                                                     | 3.07 | .20 | 3.28                | 3.09 | .20 | 3.28                                                   | 3.04 | .25 | 3.28                | 3.06 | .25 |
| <i>Counterfactuals with White Mobility</i>              |                |      |     |                 |      |     |                                                          |      |     |                     |      |     |                                                        |      |     |                     |      |     |
| White Income Mobility                                   | 2.29           | 2.24 | .02 | 2.30            | 2.25 | .02 | 3.28                                                     | 3.20 | .08 | 3.28                | 3.21 | .08 | -                                                      | -    | -   | -                   | -    | -   |
| White Marital Mobility                                  | 2.29           | 2.12 | .10 | 2.30            | 2.14 | .11 | 3.28                                                     | 3.15 | .09 | 3.28                | 3.16 | .09 | -                                                      | -    | -   | -                   | -    | -   |
| White Fertility                                         | 2.29           | 2.22 | .03 | 2.30            | 2.22 | .03 | 3.28                                                     | 3.17 | .10 | 3.28                | 3.17 | .11 | -                                                      | -    | -   | 3.28                | 3.14 | .15 |
| White Fertility, Income+Marital Mobility                | 2.29           | 2.30 | .00 | 2.30            | 2.30 | .00 | 3.28                                                     | 3.30 | .00 | 3.28                | 3.29 | .00 | 3.28                                                   | 3.29 | .00 | 3.28                | 3.29 | .02 |

|                                                     |      |      |     |      |      |     |      |      |     |      |      |     |      |      |     |      |      |     |  |
|-----------------------------------------------------|------|------|-----|------|------|-----|------|------|-----|------|------|-----|------|------|-----|------|------|-----|--|
| <i>Counterfactuals with Independent Transitions</i> |      |      |     |      |      |     |      |      |     |      |      |     |      |      |     |      |      |     |  |
| Independent Income Attainment                       | 2.29 | 2.11 | .11 | 2.29 | 2.12 | .12 | 3.28 | 3.06 | .22 | 3.28 | 3.07 | .21 | -    | -    | -   | -    | -    | -   |  |
| Independent Marital Attainment                      | 2.29 | 2.12 | .10 | 2.30 | 2.14 | .11 | 3.28 | 3.12 | .10 | 3.28 | 3.09 | .20 | -    | -    | -   | -    | -    | -   |  |
| Independent Income+Marital Attainment               | 2.29 | 2.11 | .11 | 2.29 | 2.12 | .12 | 3.28 | 3.11 | .11 | 3.28 | 3.07 | .22 | 3.28 | 3.03 | .27 | 3.27 | 3.05 | .27 |  |
| <i>Counterfactuals with Perfect Mobility</i>        |      |      |     |      |      |     |      |      |     |      |      |     |      |      |     |      |      |     |  |
| Perfect Income Mobility                             | 2.29 | 2.23 | .03 | 2.30 | 2.24 | .03 | 3.28 | 3.19 | .08 | 2.67 | 2.49 | .07 | -    | -    | -   | -    | -    | -   |  |
| Perfect Marital Mobility                            | 2.29 | 2.12 | .10 | 2.30 | 2.14 | .11 | 3.28 | 3.13 | .08 | 3.28 | 3.13 | .10 | -    | -    | -   | -    | -    | -   |  |
| Perfect Income+Marital Mobility                     | 2.29 | 2.23 | .03 | 2.30 | 2.24 | .03 | 3.29 | 3.22 | .02 | 3.28 | 3.23 | .03 | -    | -    | -   | -    | -    | -   |  |
| <i>Counterfactuals with No Mobility</i>             |      |      |     |      |      |     |      |      |     |      |      |     |      |      |     |      |      |     |  |
| No Income Mobility                                  | 2.29 | 2.22 | .03 | 2.30 | 2.24 | .03 | 3.29 | 3.19 | .08 | 3.28 | 3.19 | .09 | -    | -    | -   | -    | -    | -   |  |
| No Marital Mobility                                 | 2.29 | 2.12 | .10 | 2.30 | 2.14 | .11 | 3.28 | 3.13 | .08 | 3.29 | 3.13 | .10 | -    | -    | -   | -    | -    | -   |  |
| No Income+Marital Mobility                          | 2.29 | 2.22 | .03 | 2.30 | 2.24 | .03 | 3.28 | 3.22 | .03 | 3.29 | 3.23 | .03 | -    | -    | -   | -    | -    | -   |  |

*Source:* Panel Study of Income Dynamics, National Vital Statistics, decennial Census, and March Current Population Survey data.

*Note:* Cell entries show entropy of white and black distributions (W and B columns) and KL divergence between white and black distributions (KL columns). Empty cells represent undefined counterfactuals.

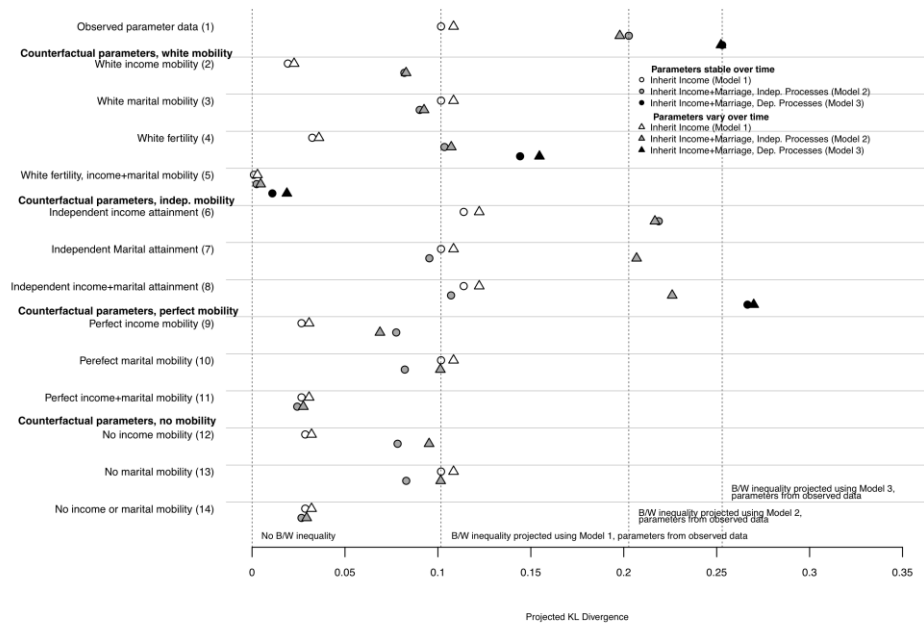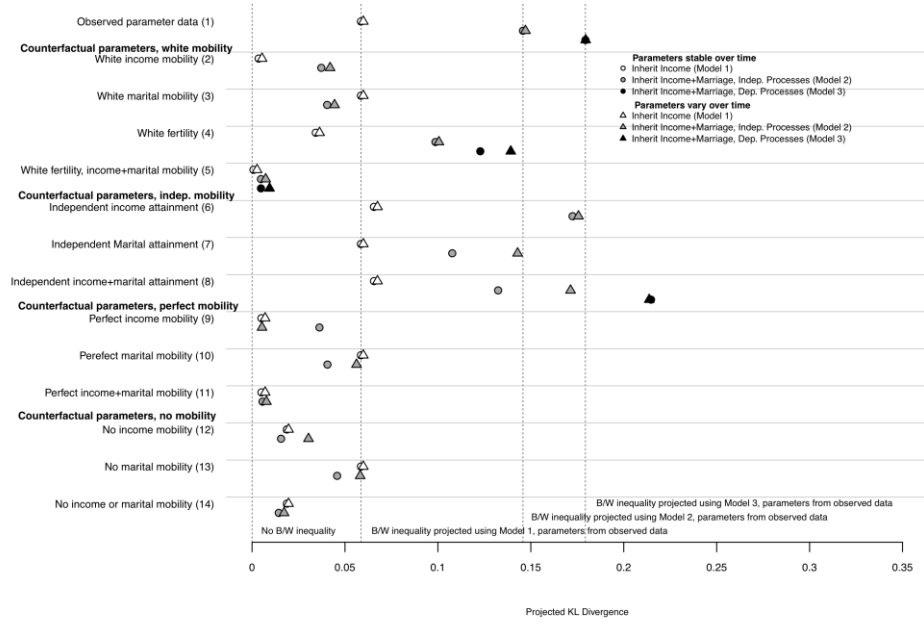

**Figure S1.** Markov Population Projection Estimates of Black-White Inequality

*Source:* Panel Study of Income Dynamics, National Vital Statistics, decennial Census, and March Current Population Survey data.

*Note:* Top panel shows fertility by race only; bottom panel shows fertility by race, class, and marital status.

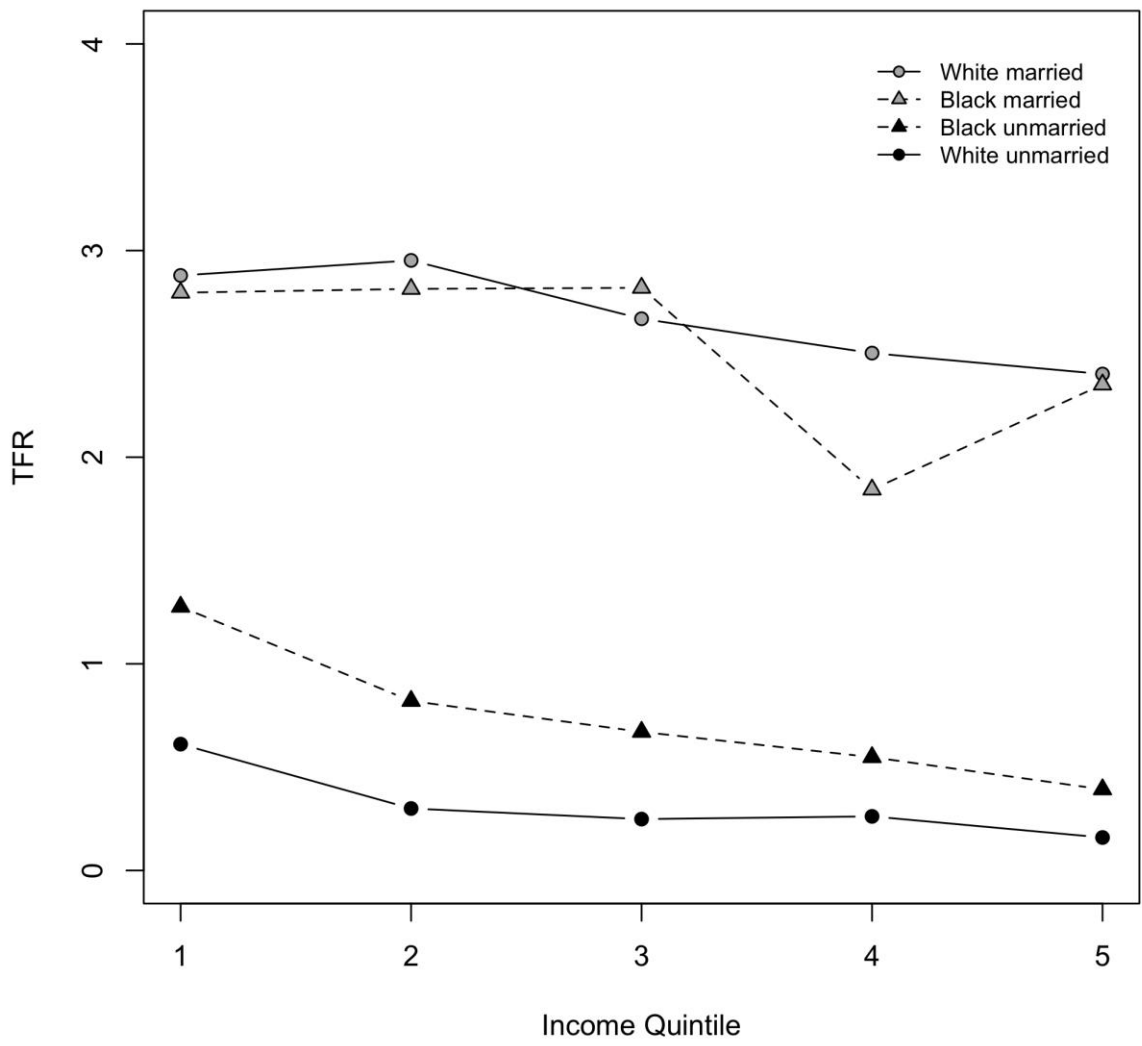

**Figure S2.** Total Fertility Rates Calculated Using Own-Child Method, by Race, Marital Status, and Income Quintile  
*Source:* Decennial Census data, 1970.
